# Supplementary material for: Smoke-Free Workplaces Are Associated with Protection from Second-Hand Smoke at Homes in Nigeria: Evidence for Population-Level Decisions
Source: PubMed Central journal article supplement (PMC4609351; doi:10.1155/2015/618640), 2015-10-04
Supplement: 618640.f1.pdf [file 618640.f1.pdf]

## **Smoke-free workplaces are associated with protection from second hand smoke at homes in Nigeria - evidence for population-level decisions**

Dorota Kaleta<sup>1\*</sup>, Kinga Polanska<sup>1</sup>, Bukola Usiadame<sup>2</sup>

<sup>1</sup> Department of Tobacco Control, Preventive Medicine, Medical University of Łódź, Łódź, Poland

<sup>2</sup> Department of Public Policy, University of Massachusetts, Boston, US

### **Supplementary materials**

The tables S1-S3 presents a descriptive statistics for respondent characteristics as well as predictors of smoke-free home performed for smokers and nonsmokers separately. The percentage of smoke-free homes was indicated much less frequently by smokers who declared SHS exposure in their workplace (22.4%) (Table S1). Among the nonsmokers, smoke-free home was declared by 84.2% of those exposed to SHS in the workplace and 97.0% of those who declared a smoke-free workplace (Table S2). More than 4 times higher chance of living in a smoke-free home in the case of those working in a smoke-free workplace comparing to the people who declared SHS exposure in the environment of work was observed (among the smokers adjusted OR = 4.4;  $p = 0.005$  among the nonsmokers adjusted OR = 4.9;  $p < 0.001$ ) (Table S3).

Table S1. Descriptive statistics for respondent characteristics - smokers

|                                   | Respondents (employee or self-employed) who worked indoors (out of home) N=108 |      |                    |       |
|-----------------------------------|--------------------------------------------------------------------------------|------|--------------------|-------|
|                                   | Total respondents who worked indoors                                           |      | Smoke-free at home |       |
|                                   | N                                                                              | %    | N                  | %     |
| Smoke-free in workplace           | 59                                                                             | 54.6 | 32                 | 54.2  |
| SHS in workplace                  | 49                                                                             | 45.4 | 11                 | 22.4  |
| Age                               |                                                                                |      |                    |       |
| 15-29                             | 20                                                                             | 18.5 | 10                 | 50.0  |
| 30-44                             | 59                                                                             | 54.6 | 21                 | 35.6  |
| 45-59                             | 21                                                                             | 19.4 | 9                  | 42.9  |
| 60 and above                      | 8                                                                              | 7.4  | 3                  | 37.5  |
| Gender                            |                                                                                |      |                    |       |
| Male                              | 107                                                                            | 99.1 | 42                 | 39.3  |
| Female                            | 1                                                                              | 0.9  | 1                  | 100.0 |
| Residence                         |                                                                                |      |                    |       |
| Rural                             | 55                                                                             | 50.9 | 15                 | 27.3  |
| Urban                             | 53                                                                             | 49.1 | 28                 | 52.8  |
| Geographical regions              |                                                                                |      |                    |       |
| North East                        | 12                                                                             | 11.1 | 3                  | 25.0  |
| North Central                     | 15                                                                             | 13.9 | 2                  | 13.3  |
| North West                        | 26                                                                             | 24.1 | 13                 | 50.0  |
| South East                        | 16                                                                             | 14.8 | 5                  | 31.3  |
| South West                        | 25                                                                             | 23.1 | 15                 | 60.0  |
| South South                       | 14                                                                             | 13.0 | 5                  | 35.7  |
| Education                         |                                                                                |      |                    |       |
| No formal education               | 28                                                                             | 25.9 | 12                 | 42.9  |
| Primary completed                 | 15                                                                             | 13.9 | 6                  | 40.0  |
| Secondary school completed        | 3                                                                              | 2.8  | 0                  | 0.0   |
| Higher secondary school completed | 46                                                                             | 42.6 | 18                 | 39.1  |
| College/university and above      | 16                                                                             | 14.8 | 7                  | 43.8  |
| Occupation                        |                                                                                |      |                    |       |
| Employee                          | 53                                                                             | 49.1 | 21                 | 39.6  |
| Self-employed                     | 55                                                                             | 50.9 | 22                 | 40.0  |
| Smokeless tobacco use             |                                                                                |      |                    |       |
| Yes                               | 1                                                                              | 0.9  | 0                  | 0.0   |
| No                                | 107                                                                            | 99.1 | 43                 | 40.2  |

SHS- Second hand smoke

Table S2. Descriptive statistics for respondent characteristics – non--smokers

|                                   | Respondents (employee or self-employed) who worked indoors (out of home) N=1748 |      |                    |      |
|-----------------------------------|---------------------------------------------------------------------------------|------|--------------------|------|
|                                   | Total respondents who worked indoors                                            |      | Smoke-free at home |      |
|                                   | N                                                                               | %    | N                  | %    |
| Smoke-free in workplace           | 1526                                                                            | 87.3 | 1480               | 97.0 |
| SHS in workplace                  | 222                                                                             | 12.7 | 187                | 84.2 |
| Age                               |                                                                                 |      |                    |      |
| 15-29                             | 458                                                                             | 26.2 | 429                | 93.7 |
| 30-44                             | 836                                                                             | 47.8 | 799                | 95.6 |
| 45-59                             | 344                                                                             | 19.7 | 333                | 96.8 |
| 60 and above                      | 110                                                                             | 6.3  | 106                | 96.4 |
| Gender                            |                                                                                 |      |                    |      |
| Male                              | 1018                                                                            | 58.2 | 972                | 95.5 |
| Female                            | 730                                                                             | 41.8 | 695                | 95.2 |
| Residence                         |                                                                                 |      |                    |      |
| Rural                             | 567                                                                             | 32.4 | 527                | 92.9 |
| Urban                             | 1181                                                                            | 67.6 | 1140               | 96.5 |
| Geographical regions              |                                                                                 |      |                    |      |
| North East                        | 129                                                                             | 7.4  | 119                | 92.2 |
| North Central                     | 191                                                                             | 10.9 | 182                | 95.3 |
| North West                        | 227                                                                             | 13.0 | 212                | 93.4 |
| South East                        | 250                                                                             | 14.3 | 234                | 93.6 |
| South West                        | 693                                                                             | 39.6 | 670                | 96.7 |
| South-South                       | 258                                                                             | 14.8 | 250                | 96.9 |
| Education                         |                                                                                 |      |                    |      |
| No formal education               | 298                                                                             | 17.0 | 272                | 91.3 |
| Primary completed                 | 194                                                                             | 11.1 | 187                | 96.4 |
| Secondary school completed        | 97                                                                              | 5.6  | 86                 | 88.7 |
| Higher secondary school completed | 806                                                                             | 46.1 | 779                | 96.7 |
| College/university and above      | 353                                                                             | 20.2 | 343                | 97.2 |
| Occupation                        |                                                                                 |      |                    |      |
| Employee                          | 717                                                                             | 41.0 | 698                | 97.4 |
| Self-employed                     | 1031                                                                            | 59.0 | 969                | 94.0 |
| Smokeless tobacco use             |                                                                                 |      |                    |      |
| Yes                               | 21                                                                              | 1.2  | 14                 | 67.7 |
| No                                | 1727                                                                            | 98.8 | 1653               | 95.7 |

SHS- Second hand smoke

Table S3. Predictors of smoke-free home. Crude and adjusted odds ratio (95% CI) - analysis for smokers and non-smokers

|                                   | Smokers           |         |                      |         | Non-smokers       |         |                      |         |
|-----------------------------------|-------------------|---------|----------------------|---------|-------------------|---------|----------------------|---------|
|                                   | Crude OR (95% CI) | p       | Adjusted OR (95% CI) | p       | Crude OR (95% CI) | P       | Adjusted OR (95% CI) | p       |
| Smoke-free at workplace           |                   |         |                      |         |                   |         |                      |         |
| Yes                               | 4.1 (1.7-9.6)     | p=0.001 | 4.4 (1.6-12.2)       | p=0.005 | 6.0 (3.8-9.6)     | p<0.001 | 4.9 (3.0-8.0)        | p<0.001 |
| No                                | 1 (ref.)          |         | 1 (ref.)             |         | 1 (ref.)          |         | 1 (ref.)             |         |
| Age (years)                       | 1.0 (1.0-1.03)    | p=0.9   |                      |         | 1.02 (1.00-1.04)  | p=0.04  | 1.0 (1.0-1.1)        | p=0.01  |
| Gender*                           |                   |         |                      |         |                   |         |                      |         |
| Male                              |                   |         |                      |         | 1 (ref.)          |         |                      |         |
| Female                            |                   |         |                      |         | 0.9 (0.6-1.5)     | p=0.8   |                      |         |
| Residence                         |                   |         |                      |         |                   |         |                      |         |
| Rural                             | 1 (ref.)          |         | 1 (ref.)             |         | 1 (ref.)          |         | 1 (ref.)             |         |
| Urban                             | 3.0 (1.3-6.7)     | p=0.009 | 3.8 (1.2-12.1)       | p=0.02  | 2.1 (1.3-3.3)     | p=0.001 | 1.4 (0.3-2.4)        | p=0.2   |
| Regions                           |                   |         |                      |         |                   |         |                      |         |
| North East                        | 2.2 (0.3-16.1)    | p=0.4   | 1.6(0.2-13.9)        | p=0.7   | 0.6 (0.2-1.5)     | p=0.3   |                      |         |
| North Central                     | 1 (ref.)          |         | 1 (ref)              |         | 1 (ref.)          |         |                      |         |
| North West                        | 6.5 (1.2-35.5)    | p=0.03  | 13.3 (1.9-93.6)      | p=0.01  | 0.7 (0.3-1.6)     | p=0.4   |                      |         |
| South East                        | 3.0 (0.5-18.8)    | p=0.2   | 1.7 (0.2-12.3)       | p=0.6   | 0.7 (0.3-1.7)     | p=0.4   |                      |         |
| South West                        | 9.8 (1.8-54.1)    | p=0.01  | 3.9 (0.6-24.9)       | p=0.2   | 1.4 (0.7-3.2)     | p=0.4   |                      |         |
| South-South                       | 3.6 (0.6-23.4)    | p=0.2   | 2.7 (0.4-20.0)       | p=0.3   | 1.5 (0.6-4.1)     | p=0.4   |                      |         |
| Education                         |                   |         |                      |         |                   |         |                      |         |
| No formal education               | 1.3 (0.5-3.4)     | p=0.6   | 1.5 (0.7-3.2)        |         | 1.3 (0.3-2.8)     | p=0.4   | 1.4 (0.6-3.4)        | p=0.4   |
| Primary completed                 | 1.1 (0.3-3.8)     | p=0.8   | 2.2 (0.96-5.2)       |         | 3.4 (1.3-9.1)     | p=0.01  | 3.1 (1.1-8.9)        | p=0.03  |
| Secondary school completed **     | 1 (ref.)          |         |                      |         | 1 (ref.)          |         | 1 (ref.)             |         |
| Higher secondary school completed |                   |         |                      |         | 3.7 (1.8-7.7)     | p<0.001 | 2.4 (1.1-5.4)        | p=0.03  |
| College/university and above      | 1.3 (0.4-4.3)     | p=0.6   |                      |         | 4.4 (1.8-10.7)    | p=0.001 | 1.7 (0.6-4.9)        | p=0.3   |
| Occupation                        |                   |         |                      |         |                   |         |                      |         |
| Employee                          | 0.98 (0.5-2.1)    | p=0.9   |                      |         | 2.4 (1.4-4.0)     | p=0.001 | 1.6 (0.8-3.0)        | p=0.2   |
| Self employed                     | 1 (ref.)          |         |                      |         | 1 (ref.)          |         | 1 (ref.)             |         |
| Smokeless tobacco use***          |                   |         |                      |         |                   |         |                      |         |
| Yes                               |                   |         |                      |         | 1 (ref.)          |         | 1 (ref.)             |         |
| No                                |                   |         |                      |         | 11.2 (4.4-28.5)   | p<0.001 | 9.4 (2.1-28.7)       | p=0.001 |
| Number of people in household     | 1.1 (0.9-1.2)     | p=0.2   |                      |         | 0.95 (0.9-1.01)   | p=0.1   | 1.1 (0.9-1.1)        | p=0.3   |

\*gender was not included in analysis among smokers (as only 1 women smoked cigarettes)

\*\*among smokers the reference variable was created as combined variables: „secondary school completed” and „higher secondary school completed’ (as only 3 smokers indicated “secondary school completed”).

\*\*\* variable “smokeless tobacco use” was not included in analysis among smokers (as only 1 person indicated the usage of smokeless tobacco)
